# Supplementary material for: Incorporation of cobalt ions into magnetoelectric gallium ferrite epitaxial films: tuning of conductivity and magnetization
Source: Royal Society of Chemistry journal article supplement (doi:10.1039/c5ra03609g), 2015-01-01
Supplement: c5ra03609g1.pdf [file c5ra03609g1.pdf]

### Supplementary Information

S. H. Oh *et al.* "Incorporation of cobalt ions into magnetoelectric gallium ferrite epitaxial films: tuning of conductivity and magnetization".

Figure S1 shows the X-ray diffraction patterns for Co-doped and undoped GFO with different composition ratios. For GFO:Co (6.9%), additional peaks can be observed at  $2\theta = 59$  and  $80^\circ$ . They correspond, respectively, to the (333) and (444) reflections of a spinel phase (ICDD PDF#01-074-2229).

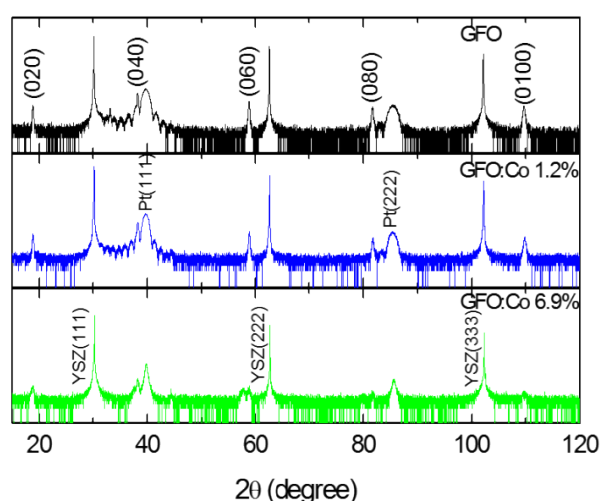

**Figure S1. X-ray diffraction patterns of the GFO:Co thin films on Pt/Ti/YSZ(111).**

The lattice parameters of Co-doped and undoped GFO, obtained by reciprocal space mapping (RSM), are shown in Table S1. They are not meaningful for the 6.9% composition, because it contains a parasitic phase. The exact composition of the GFO phase in the mixture is therefore not known in this case.

**Table S1. Lattice parameters of Co doped GFO with different composition ratios.**

| Co % | $b$<br>by $\theta$ - $2\theta$<br>scans ( $\text{\AA}$ ) | $b$<br>by RSM<br>( $\text{\AA}$ ) | $c$<br>by RSM<br>( $\text{\AA}$ ) | $a$<br>by RSM<br>( $\text{\AA}$ ) | Unit cell volume<br>( $\text{\AA}^3$ ) |
|------|----------------------------------------------------------|-----------------------------------|-----------------------------------|-----------------------------------|----------------------------------------|
| 0.0  | 9.424(1)                                                 | 9.424(1)                          | 5.088(1)                          | 8.788(1)                          | 421.38                                 |
| 1.2  | 9.418(1)                                                 | 9.412(1)                          | 5.081(1)                          | 8.774(1)                          | 419.59                                 |
| 6.9  | 9.404(1)                                                 | 9.404(1)                          | 5.089(1)                          | 8.783(1)                          | 420.33                                 |
